# Supplementary material
Source: PubMed Central journal article supplement (PMC2802465)
Supplement: NIHMS144568-supplement-1_si_001.pdf [file NIHMS144568-supplement-1_si_001.pdf]

## **Integrated microfluidic device for serum biomarker quantitation using either standard addition or a calibration curve**

Weichun Yang, Xiuhua Sun, Hsiang-Yu Wang, and Adam T. Woolley

### **SUPPORTING INFORMATION**

**Supporting Movie.** Fluorescence video image of a microchannel after an anti-AFP column (the column is located to the right of the illuminated region), showing loading, rinsing and elution steps with FITC-AFP. Loading step: from 0:00 to 1:20. The fluorescence signal gradually increases, indicative of unretained fluorescent compounds (e.g., unconjugated FITC) exiting the column. Rinsing step: from 1:21 to 3:02. A fluorescent band leaves the column in the first 25 s of this step, indicating non-bound fluorescent material being rinsed from the column. From 1:50 to 3:02, the remaining rinsed fluorescent material flows out from the detection window. Elution step: from 3:03 to 3:21; a narrow fluorescent band of FITC-AFP elutes from the affinity column from right to left and passes through the detection window. The low pH (~2) of the eluting solution decreases the fluorescence signal relative to the previous steps.

**Table S1.** Peak heights of AFP in dynamic labeling with Alexa Fluor 488 TFP Ester at room temperature (derived from Figure S3).

| Labeling time (min) | AFP Peak Height (arb. units) |
|---------------------|------------------------------|
| 5                   | 0.0060                       |
| 10                  | 0.0116                       |
| 15                  | 0.0174                       |
| 20                  | 0.0209                       |
| 30                  | 0.0244                       |
| 60                  | 0.0258                       |
| 120                 | 0.0258                       |

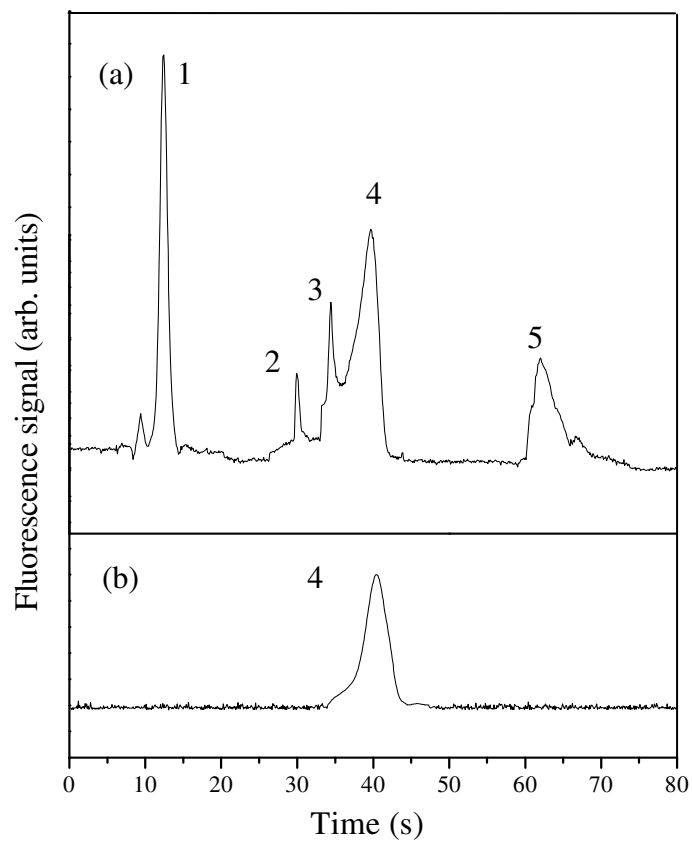

**Figure S1.** Microchip CE of a mixture (a) before and (b) after affinity column extraction. Peaks 1-5 are FITC-Gly, GFP, FITC-BSA, FITC-AFP, and FITC-IgG, respectively. These runs were carried out on a separate device with a different detection position compared to the runs in Fig. 4, where the AFP peak migrated closer to 30 s.

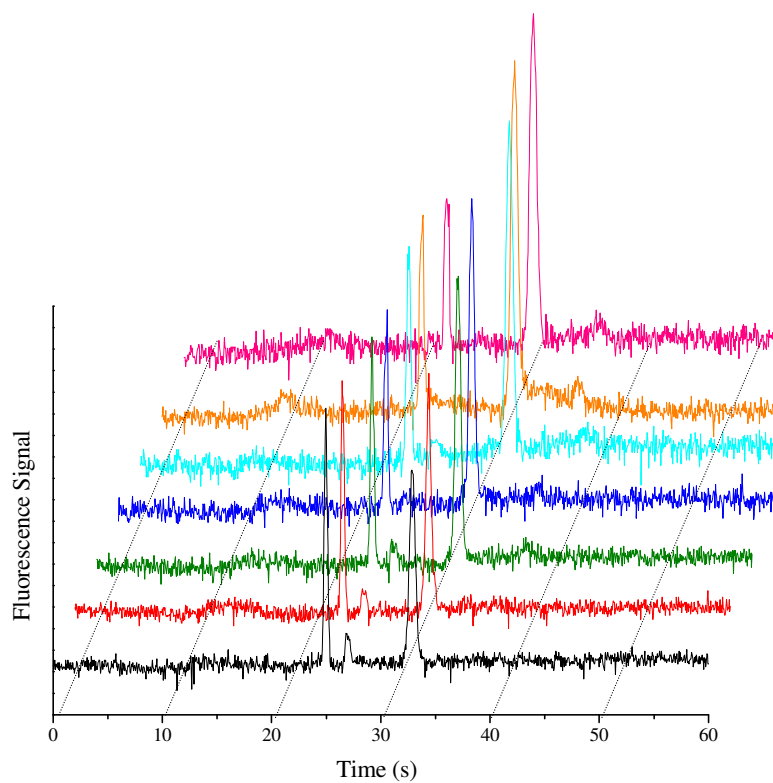

**Figure S2.** Dynamic labeling of AFP with Alexa Fluor 488 TFP Ester at room temperature. Traces are black: labeling 5 min, red: 10 min, green: 15 min, blue: 20 min, light blue: 30 min, orange: 60 min, and pink: 120 min. The unattached label migrates at ~23 s, and the AFP peak is at ~32 s.
